# Supplementary material
Source: Springer Nature journal article supplement (https://www.springermedizin.de/resource/supplementary/12885_2007_1060_MOESM2_ESM.pdf/9471004)

# 11

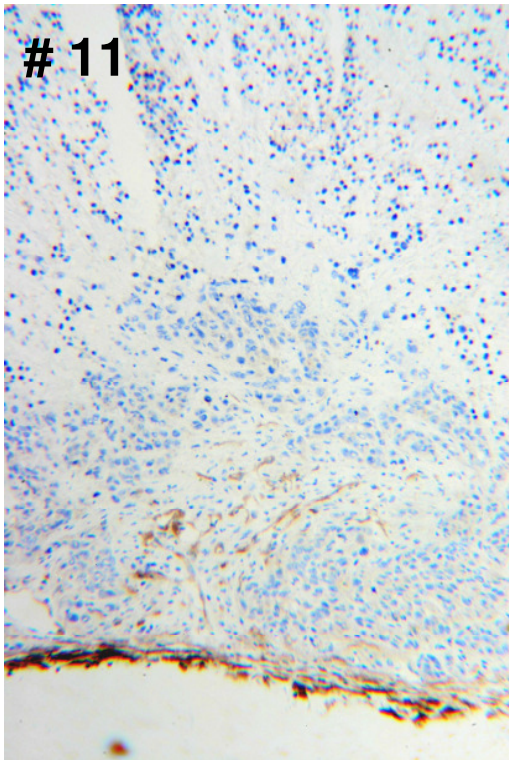

#13

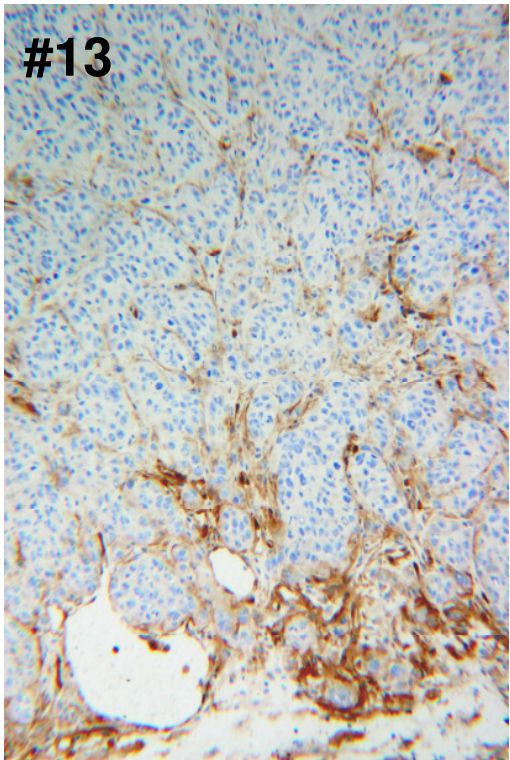

Supplement: MOESM2 [file 9471004]
